# Supplementary material for: Whole genome sequencing distinguishes skin colonizing from infection-associated Cutibacterium acnes isolates
Source: Front Cell Infect Microbiol. 2024 Oct 24;14:1433783. doi: 10.3389/fcimb.2024.1433783 (PMC11540793; doi:10.3389/fcimb.2024.1433783)
Supplement: Supplementary Data Sheet 3 — GWAS from SNP data. [file DataSheet3.xlsx]

## Sheet: snp_gwas
chrom	start	end	gene	value	group
KIGMODEG_1	79311	79311	RS00355	0.0540533	clinical
KIGMODEG_1	79331	79331	RS00355	0.0540533	clinical
KIGMODEG_1	79342	79342	RS00355	0.0540533	clinical
KIGMODEG_1	79361	79361	RS00355	0.0540533	clinical
KIGMODEG_1	79390	79390	RS00355	0.0540533	clinical
KIGMODEG_1	79408	79408	RS00355	0.0540533	clinical
KIGMODEG_1	79474	79474	RS00355	0.0540533	clinical
KIGMODEG_1	255219	255219	RS01125	0.0540533	clinical
KIGMODEG_1	293327	293327	RS01290	0.0540533	clinical
KIGMODEG_1	293328	293328	RS01290	0.0540533	clinical
KIGMODEG_1	293379	293379	RS01290	0.0540533	clinical
KIGMODEG_1	384753	384753	radA	0.0540533	clinical
KIGMODEG_1	384765	384765	radA	0.0540533	clinical
KIGMODEG_1	384795	384795	radA	0.0540533	clinical
KIGMODEG_1	384834	384834	radA	0.0540533	clinical
KIGMODEG_1	384857	384857	radA	0.0540533	clinical
KIGMODEG_1	384894	384894	radA	0.0540533	clinical
KIGMODEG_1	384918	384918	radA	0.0540533	clinical
KIGMODEG_1	384951	384951	radA	0.0540533	clinical
KIGMODEG_1	384963	384963	radA	0.0540533	clinical
KIGMODEG_1	384984	384984	radA	0.0540533	clinical
KIGMODEG_1	456975	456975	RS02140	0.0540533	clinical
KIGMODEG_1	478364	478364	cobD	0.0540533	clinical
KIGMODEG_1	478399	478399	cobD	0.0540533	clinical
KIGMODEG_1	478403	478403	cobD	0.0540533	clinical
KIGMODEG_1	478550	478550	cobD	0.0540533	clinical
KIGMODEG_1	478557	478557	cobD	0.0540533	clinical
KIGMODEG_1	478559	478559	cobD	0.0540533	clinical
KIGMODEG_1	520792	520792	iolB	0.0540533	clinical
KIGMODEG_1	520794	520794	iolB	0.0540533	clinical
KIGMODEG_1	520796	520796	iolB	0.0540533	clinical
KIGMODEG_1	520851	520851	iolB	0.0540533	clinical
KIGMODEG_1	520860	520860	iolB	0.0540533	clinical
KIGMODEG_1	520907	520907	iolB	0.0178541	clinical
KIGMODEG_1	557278	557278	RS02615	0.0540533	clinical
KIGMODEG_1	557346	557346	RS02615	0.0540533	clinical
KIGMODEG_1	557349	557349	RS02615	0.0540533	clinical
KIGMODEG_1	557362	557362	RS02615	0.0540533	clinical
KIGMODEG_1	557400	557400	RS02615	0.0540533	clinical
KIGMODEG_1	557440	557440	RS02615	0.0540533	clinical
KIGMODEG_1	557442	557442	RS02615	0.0540533	clinical
KIGMODEG_1	557443	557443	RS02615	0.0540533	clinical
KIGMODEG_1	557460	557460	RS02615	0.0540533	clinical
KIGMODEG_1	557469	557469	RS02615	0.0540533	clinical
KIGMODEG_1	557490	557490	RS02615	0.0540533	clinical
KIGMODEG_1	557556	557556	RS02615	0.0178541	clinical
KIGMODEG_1	599970	599970	RS02830	0.0540533	clinical
KIGMODEG_1	600036	600036	noncoding	0.0540533	clinical
KIGMODEG_1	600125	600125	noncoding	0.0540533	clinical
KIGMODEG_1	803571	803571	RS03715	0.0540533	clinical
KIGMODEG_1	803574	803574	RS03715	0.0540533	clinical
KIGMODEG_1	803632	803632	RS03715	0.0540533	clinical
KIGMODEG_1	979394	979394	RS04575	9.79728e-05	clinical
KIGMODEG_1	1104286	1104286	RS05195	0.0540533	clinical
KIGMODEG_1	1104382	1104382	RS05195	0.0540533	clinical
KIGMODEG_1	1104403	1104403	RS05195	0.0540533	clinical
KIGMODEG_1	1104433	1104433	RS05195	0.0540533	clinical
KIGMODEG_1	1104445	1104445	RS05195	0.0540533	clinical
KIGMODEG_1	1104484	1104484	RS05195	0.0540533	clinical
KIGMODEG_1	1104532	1104532	RS05195	0.0540533	clinical
KIGMODEG_1	1104550	1104550	RS05195	0.0540533	clinical
KIGMODEG_1	1104568	1104568	RS05195	0.0540533	clinical
KIGMODEG_1	1104577	1104577	RS05195	0.0540533	clinical
KIGMODEG_1	1104625	1104625	RS05195	9.79728e-05	clinical
KIGMODEG_1	1104626	1104626	RS05195	9.79728e-05	clinical
KIGMODEG_1	1104627	1104627	RS05195	0.0354823	clinical
KIGMODEG_1	1104637	1104637	RS05195	0.0354823	clinical
KIGMODEG_1	1243640	1243640	RS05835	0.0540533	clinical
KIGMODEG_1	1243778	1243778	noncoding	0.000317508	clinical
KIGMODEG_1	1314924	1314924	RS06150	0.0540533	clinical
KIGMODEG_1	1315044	1315044	RS06150	0.0540533	clinical
KIGMODEG_1	1349648	1349648	RS06315	0.0540533	clinical
KIGMODEG_1	1349714	1349714	RS06315	0.0540533	clinical
KIGMODEG_1	1349747	1349747	RS06315	0.0540533	clinical
KIGMODEG_1	1357544	1357544	RS06350	9.79728e-05	clinical
KIGMODEG_1	1357587	1357587	RS06350	9.79728e-05	clinical
KIGMODEG_1	1357670	1357670	RS06350	9.79728e-05	clinical
KIGMODEG_1	1357678	1357678	RS06350	9.79728e-05	clinical
KIGMODEG_1	1357717	1357717	RS06350	9.79728e-05	clinical
KIGMODEG_1	1357766	1357766	RS06350	9.79728e-05	clinical
KIGMODEG_1	1357937	1357937	RS06350	9.79728e-05	clinical
KIGMODEG_1	1410463	1410463	RS06590	9.79728e-05	clinical
KIGMODEG_1	1410688	1410688	RS06590	9.79728e-05	clinical
KIGMODEG_1	1410701	1410701	RS06590	9.79728e-05	clinical
KIGMODEG_1	1410706	1410706	RS06590	9.79728e-05	clinical
KIGMODEG_1	1468620	1468620	uvrC	0.0354823	clinical
KIGMODEG_1	1468713	1468713	uvrC	0.0540533	clinical
KIGMODEG_1	1468764	1468764	uvrC	0.0540533	clinical
KIGMODEG_1	1468827	1468827	uvrC	0.0540533	clinical
KIGMODEG_1	1468857	1468857	uvrC	0.0540533	clinical
KIGMODEG_1	1468905	1468905	uvrC	0.0540533	clinical
KIGMODEG_1	1468923	1468923	uvrC	0.0540533	clinical
KIGMODEG_1	1468956	1468956	uvrC	0.0540533	clinical
KIGMODEG_1	1468962	1468962	uvrC	0.0540533	clinical
KIGMODEG_1	1468967	1468967	uvrC	9.79728e-05	clinical
KIGMODEG_1	1468970	1468970	uvrC	0.0540533	clinical
KIGMODEG_1	1468971	1468971	uvrC	0.0540533	clinical
KIGMODEG_1	1468980	1468980	uvrC	0.0540533	clinical
KIGMODEG_1	1472935	1472935	uvrA	0.0540533	clinical
KIGMODEG_1	1472953	1472953	uvrA	9.79728e-05	clinical
KIGMODEG_1	1473196	1473196	uvrA	9.79728e-05	clinical
KIGMODEG_1	1546664	1546664	gcvP	9.79728e-05	clinical
KIGMODEG_1	1546699	1546699	gcvP	9.79728e-05	clinical
KIGMODEG_1	1546705	1546705	gcvP	9.79728e-05	clinical
KIGMODEG_1	1546723	1546723	gcvP	9.79728e-05	clinical
KIGMODEG_1	1546741	1546741	gcvP	0.0540533	clinical
KIGMODEG_1	1546753	1546753	gcvP	9.79728e-05	clinical
KIGMODEG_1	1546924	1546924	gcvP	9.79728e-05	clinical
KIGMODEG_1	1546928	1546928	gcvP	0.0178541	clinical
KIGMODEG_1	1571915	1571915	noncoding	0.0540533	clinical
KIGMODEG_1	1571917	1571917	noncoding	0.0540533	clinical
KIGMODEG_1	1571953	1571953	noncoding	0.0540533	clinical
KIGMODEG_1	1571993	1571993	noncoding	0.0178541	clinical
KIGMODEG_1	1572005	1572005	noncoding	0.0540533	clinical
KIGMODEG_1	1572016	1572016	noncoding	0.0540533	clinical
KIGMODEG_1	1572068	1572068	noncoding	0.0540533	clinical
KIGMODEG_1	1572070	1572070	noncoding	0.0540533	clinical
KIGMODEG_1	1585733	1585733	RS07450	9.79728e-05	clinical
KIGMODEG_1	1585739	1585739	RS07450	9.79728e-05	clinical
KIGMODEG_1	1585742	1585742	RS07450	9.79728e-05	clinical
KIGMODEG_1	1585775	1585775	RS07450	9.79728e-05	clinical
KIGMODEG_1	1585811	1585811	RS07450	9.79728e-05	clinical
KIGMODEG_1	1585817	1585817	RS07450	9.79728e-05	clinical
KIGMODEG_1	1585844	1585844	RS07450	9.79728e-05	clinical
KIGMODEG_1	1585853	1585853	RS07450	9.79728e-05	clinical
KIGMODEG_1	1585862	1585862	RS07450	9.79728e-05	clinical
KIGMODEG_1	1585865	1585865	RS07450	9.79728e-05	clinical
KIGMODEG_1	1585868	1585868	RS07450	9.79728e-05	clinical
KIGMODEG_1	1585871	1585871	RS07450	9.79728e-05	clinical
KIGMODEG_1	1585876	1585876	RS07450	9.79728e-05	clinical
KIGMODEG_1	1585877	1585877	RS07450	9.79728e-05	clinical
KIGMODEG_1	1585886	1585886	RS07450	0.0525238	clinical
KIGMODEG_1	1646794	1646794	noncoding	0.0540533	clinical
KIGMODEG_1	1646801	1646801	noncoding	0.0540533	clinical
KIGMODEG_1	1646915	1646915	RS07725	0.0540533	clinical
KIGMODEG_1	1680212	1680212	RS07875	0.0540533	clinical
KIGMODEG_1	1680251	1680251	RS07875	0.0540533	clinical
KIGMODEG_1	1680274	1680274	RS07875	0.0540533	clinical
KIGMODEG_1	1680295	1680295	RS07875	0.0540533	clinical
KIGMODEG_1	1680320	1680320	RS07875	0.0540533	clinical
KIGMODEG_1	1680322	1680322	RS07875	0.0540533	clinical
KIGMODEG_1	1680340	1680340	RS07875	0.0540533	clinical
KIGMODEG_1	1680404	1680404	RS07875	0.0540533	clinical
KIGMODEG_1	1680459	1680459	RS07875	0.0540533	clinical
KIGMODEG_1	1680481	1680481	RS07875	0.0540533	clinical
KIGMODEG_1	1680484	1680484	RS07875	0.0540533	clinical
KIGMODEG_1	1680496	1680496	RS07875	0.0540533	clinical
KIGMODEG_1	1680497	1680497	RS07875	0.0540533	clinical
KIGMODEG_1	1809038	1809038	purE	9.79728e-05	clinical
KIGMODEG_1	1864138	1864138	ribB	0.0540533	clinical
KIGMODEG_1	1864149	1864149	ribB	0.0540533	clinical
KIGMODEG_1	1864163	1864163	ribB	0.0540533	clinical
KIGMODEG_1	1864190	1864190	ribB	0.0540533	clinical
KIGMODEG_1	1864193	1864193	ribB	0.0540533	clinical
KIGMODEG_1	1864229	1864229	ribB	0.0540533	clinical
KIGMODEG_1	1864298	1864298	ribB	0.0540533	clinical
KIGMODEG_1	1864316	1864316	ribB	0.0540533	clinical
KIGMODEG_1	1864334	1864334	ribB	0.0540533	clinical
KIGMODEG_1	1867016	1867016	RS08770	0.0540533	clinical
KIGMODEG_1	1867051	1867051	RS08770	0.0540533	clinical
KIGMODEG_1	1899896	1899896	rimI	9.79728e-05	clinical
KIGMODEG_1	1899923	1899923	rimI	9.79728e-05	clinical
KIGMODEG_1	2179233	2179233	RS10235	0.0178541	clinical
KIGMODEG_1	2491728	2491728	RS11720	0.0178541	clinical
KIGMODEG_1	2491745	2491745	RS11720	0.0540533	clinical
KIGMODEG_1	2491751	2491751	RS11720	0.0540533	clinical
KIGMODEG_1	2491752	2491752	RS11720	0.0540533	clinical
KIGMODEG_1	2491759	2491759	RS11720	0.0540533	clinical
KIGMODEG_1	2491767	2491767	RS11720	0.0540533	clinical
KIGMODEG_1	2491781	2491781	RS11720	0.00100972	clinical
KIGMODEG_1	2491787	2491787	RS11720	0.0540533	clinical
KIGMODEG_1	2491791	2491791	RS11720	0.0540533	clinical
KIGMODEG_1	2491793	2491793	RS11720	0.0540533	clinical
KIGMODEG_1	2491823	2491823	RS11720	0.0540533	clinical
KIGMODEG_1	2491825	2491825	RS11720	0.0540533	clinical
KIGMODEG_1	2491839	2491839	RS11720	0.00100972	clinical
KIGMODEG_1	2491864	2491864	RS11720	0.0540533	clinical
KIGMODEG_1	2491933	2491933	noncoding	0.0540533	clinical
KIGMODEG_1	2492007	2492007	yidC	0.0540533	clinical
KIGMODEG_1	2492063	2492063	yidC	0.0540533	clinical
KIGMODEG_1	2492073	2492073	yidC	0.0540533	clinical
